# Supplementary material for: Integrated Analysis of miR-430 on Steroidogenesis-Related Gene Expression of Larval Rice Field Eel Monopterus albus
Source: MDPI journal article supplement (doi:10.3390/ijms22136994), 2021-06-29
Supplement: s1 [file s1]

Table S1 Sequencing data quality.

Clean reads were obtained by removing low-quality reads and those containing adapter and poly-N from the raw data. Q30 = quality value (>30)/total base.

| Sample        | raw reads        | clean reads      | valid bases (%) | Q30 (%)    | Mapping rate (%) |
|---------------|------------------|------------------|-----------------|------------|------------------|
| agomirNC      | 46774609±2035511 | 45766630±1951401 | 97.85±0.11      | 94.51±0.2  | 92.55±0.26       |
| agomir430a    | 46086528±1412475 | 45131700±1344490 | 97.93±0.11      | 94.28±0.06 | 92.2±0.05        |
| agomir430b    | 47978387±792476  | 46796464±719636  | 97.54±0.16      | 93.73±0.69 | 92.35±0.24       |
| agomir430c    | 46906758±446238  | 45736631±514893  | 97.51±0.2       | 94.3±0.18  | 92.4±0.31        |
| antagomirNC   | 46159767±988096  | 45032195±840140  | 97.56±0.58      | 94.35±0.15 | 92.1±0.19        |
| antagomir430a | 47575397±964445  | 46390373±1028522 | 97.51±0.19      | 94.37±0.16 | 91.73±0.36       |
| antagomir430b | 46688399±1218920 | 45415640±1195089 | 97.27±0.09      | 94.49±0.06 | 91.84±0.16       |
| antagomir430c | 46589309±1375614 | 45249100±1235378 | 97.13±0.41      | 94.36±0.23 | 92.01±0.34       |

Table S2 Statistical result of DEGs (up and down).

When we compared T11 with the C1, 149 DEGs (including 69 upregulated and 80 downregulated) were identified. C1, agomirNC; C2, antagomirNC; T11, agomir430a; T21, antagomir430a; T12, agomir430b; T22, antagomir430b; T13, agomir430c; T23, antagomir430c. n=3 for each microinjection group.

| Control | Case | Up_diff | Down_diff | Total_diff |
|---------|------|---------|-----------|------------|
| C1      | T11  | 69      | 80        | 149        |
| C1      | T12  | 105     | 19        | 124        |
| C1      | T13  | 145     | 82        | 227        |
| C2      | C1   | 977     | 1967      | 2944       |
| C2      | T21  | 256     | 697       | 953        |
| C2      | T22  | 369     | 1208      | 1577       |
| C2      | T23  | 301     | 821       | 1122       |
| T21     | T11  | 437     | 390       | 827        |
| T22     | T12  | 827     | 314       | 1141       |
| T23     | T13  | 1967    | 1541      | 3508       |

Table S3 Top 10 significant GO enrichment among the DEGs.

Using q value to determine the significant value of the collected GO clusters, 0.01 represents significant significance. n=3 for each microinjection group.

| Ontology                       | ID         | Description                                                     | qvalue   | Count |
|--------------------------------|------------|-----------------------------------------------------------------|----------|-------|
| <b>agomir430a vs. agomirNC</b> |            |                                                                 |          |       |
| biological process             | GO:0036292 | DNA rewinding                                                   | 9.07E-24 | 12    |
|                                | GO:0000733 | DNA strand renaturation                                         | 8.06E-21 | 12    |
|                                | GO:0048478 | replication fork protection                                     | 5.42E-20 | 12    |
|                                | GO:0031297 | replication fork processing                                     | 3.61E-17 | 12    |
|                                | GO:2000104 | negative regulation of DNA-dependent DNA replication            | 1.41E-16 | 12    |
|                                | GO:0008156 | negative regulation of DNA replication                          | 4.74E-16 | 12    |
|                                | GO:0045005 | DNA-dependent DNA replication maintenance of fidelity           | 9.45E-16 | 12    |
|                                | GO:0090329 | regulation of DNA-dependent DNA replication                     | 3.79E-15 | 12    |
|                                | GO:0032392 | DNA geometric change                                            | 9.35E-15 | 12    |
|                                | GO:0045910 | negative regulation of DNA recombination                        | 3.86E-14 | 12    |
| molecular function             | GO:0036310 | annealing helicase activity                                     | 1.83E-22 | 12    |
|                                | GO:0070530 | K63-linked polyubiquitin modification-dependent protein binding | 1.81E-21 | 12    |
|                                | GO:0097617 | annealing activity                                              | 1.22E-20 | 12    |
|                                | GO:0004520 | endodeoxyribonuclease activity                                  | 3.11E-19 | 12    |
|                                | GO:0004536 | deoxyribonuclease activity                                      | 1.92E-17 | 12    |
|                                | GO:0031593 | polyubiquitin modification-dependent protein binding            | 2.65E-17 | 12    |
|                                | GO:0004519 | endonuclease activity                                           | 1.13E-16 | 14    |
|                                | GO:0004518 | nuclease activity                                               | 2.45E-14 | 14    |
|                                | GO:0140097 | catalytic activity, acting on DNA                               | 3.10E-13 | 14    |
|                                | GO:0140030 | modification-dependent protein binding                          | 2.70E-11 | 12    |
| cellular component             | GO:0043596 | nuclear replication fork                                        | 1.75E-15 | 12    |
|                                | GO:0005657 | replication fork                                                | 9.15E-13 | 12    |
|                                | GO:0005865 | striated muscle thin filament                                   | 2.99E-07 | 6     |
|                                | GO:0036379 | myofilament                                                     | 2.99E-07 | 6     |
|                                | GO:0000228 | nuclear chromosome                                              | 2.49E-05 | 12    |
|                                | GO:0005694 | chromosome                                                      | 0.00015  | 14    |
|                                | GO:0030018 | Z disc                                                          | 0.00015  | 6     |
|                                | GO:0031674 | I band                                                          | 0.000208 | 6     |
|                                | GO:0030017 | sarcomere                                                       | 0.002455 | 6     |
|                                | GO:0030016 | myofibril                                                       | 0.00587  | 6     |
| Ontology                       | ID         | Description                                                     | qvalue   | Count |
| <b>agomir430b vs. agomirNC</b> |            |                                                                 |          |       |
| biological process             | GO:0008610 | lipid biosynthetic process                                      | 2.59E-11 | 26    |
|                                | GO:0006699 | bile acid biosynthetic process                                  | 2.59E-11 | 9     |

|                         | GO:0008206 | bile acid metabolic process                                                 |  | 2.79E-10    | 9     |
|-------------------------|------------|-----------------------------------------------------------------------------|--|-------------|-------|
|                         | GO:0015850 | organic hydroxy compound transport                                          |  | 7.47E-10    | 16    |
|                         | GO:0015918 | sterol transport                                                            |  | 3.94E-09    | 10    |
|                         | GO:0019432 | triglyceride biosynthetic process                                           |  | 5.43E-08    | 9     |
|                         | GO:0072330 | monocarboxylic acid biosynthetic process                                    |  | 5.43E-08    | 14    |
|                         | GO:0046460 | neutral lipid biosynthetic process                                          |  | 5.43E-08    | 9     |
|                         | GO:0046463 | acylglycerol biosynthetic process                                           |  | 5.43E-08    | 9     |
|                         | GO:0016053 | organic acid biosynthetic process                                           |  | 1.91E-07    | 15    |
| molecular<br>function   | GO:0003841 | 1-acylglycerol-3-phosphate O-acyltransferase activity                       |  | 3.86E-12    | 10    |
|                         | GO:0016411 | acylglycerol O-acyltransferase activity                                     |  | 3.86E-12    | 10    |
|                         | GO:0004366 | glycerol-3-phosphate O-acyltransferase activity                             |  | 3.86E-12    | 8     |
|                         | GO:0042171 | lysophosphatidic acid acyltransferase activity                              |  | 3.86E-12    | 10    |
|                         | GO:0071617 | lysophospholipid acyltransferase activity                                   |  | 3.86E-12    | 10    |
|                         | GO:0015248 | sterol transporter activity                                                 |  | 5.78E-12    | 9     |
|                         | GO:0008374 | O-acyltransferase activity                                                  |  | 4.51E-11    | 10    |
|                         | GO:0016747 | transferase activity, transferring acyl groups other than amino-acyl groups |  | 2.53E-09    | 14    |
|                         | GO:0016746 | transferase activity, transferring acyl groups                              |  | 2.79E-09    | 14    |
|                         | GO:0005319 | lipid transporter activity                                                  |  | 4.11E-07    | 10    |
| cellular<br>component   | GO:0097038 | perinuclear endoplasmic reticulum                                           |  | 2.09E-14    | 9     |
|                         | GO:0045239 | tricarboxylic acid cycle enzyme complex                                     |  | 2.95E-06    | 5     |
|                         | GO:0005789 | endoplasmic reticulum membrane                                              |  | 1.90E-05    | 17    |
|                         | GO:0098827 | endoplasmic reticulum subcompartment                                        |  | 1.90E-05    | 17    |
|                         | GO:0042175 | nuclear outer membrane-endoplasmic reticulum membrane network               |  | 1.90E-05    | 17    |
|                         | GO:0031965 | nuclear membrane                                                            |  | 7.81E-05    | 10    |
|                         | GO:0005635 | nuclear envelope                                                            |  | 0.000297952 | 11    |
|                         | GO:1990204 | oxidoreductase complex                                                      |  | 0.005057216 | 5     |
| Ontology                | ID         | Description                                                                 |  | qvalue      | Count |
| agomir430c vs. agomirNC |            |                                                                             |  |             |       |
| biological<br>process   | GO:0070208 | protein heterotrimerization                                                 |  | 6.19E-08    | 6     |
|                         | GO:0070206 | protein trimerization                                                       |  | 5.33E-06    | 6     |
|                         | GO:0045333 | cellular respiration                                                        |  | 9.06E-06    | 9     |
|                         | GO:0006103 | 2-oxoglutarate metabolic process                                            |  | 9.06E-06    | 5     |
|                         | GO:0022028 | tangential migration from the subventricular zone to the olfactory bulb     |  | 9.06E-06    | 5     |
|                         | GO:0021859 | pyramidal neuron differentiation                                            |  | 1.00E-05    | 5     |
|                         | GO:0021860 | pyramidal neuron development                                                |  | 1.00E-05    | 5     |
|                         | GO:0051291 | protein heterooligomerization                                               |  | 1.53E-05    | 9     |
|                         | GO:0006099 | tricarboxylic acid cycle                                                    |  | 1.53E-05    | 5     |

|                                      |            |                                                                                                 |               |              |
|--------------------------------------|------------|-------------------------------------------------------------------------------------------------|---------------|--------------|
|                                      | GO:0021772 | olfactory bulb development                                                                      | 1.53E-05      | 6            |
| molecular                            | GO:0016491 | oxidoreductase activity                                                                         | 0.000102346   | 13           |
| function                             | GO:0016620 | oxidoreductase activity, acting on the aldehyde or oxo group of donors, NAD or NADP as acceptor | 0.000102346   | 5            |
|                                      | GO:0016903 | oxidoreductase activity, acting on the aldehyde or oxo group of donors                          | 0.000134709   | 5            |
|                                      | GO:0019843 | rRNA binding                                                                                    | 0.003567774   | 4            |
|                                      | GO:0019842 | vitamin binding                                                                                 | 0.003567774   | 5            |
|                                      | GO:0051087 | chaperone binding                                                                               | 0.003873008   | 5            |
|                                      | GO:0005506 | iron ion binding                                                                                | 0.004767512   | 4            |
|                                      | GO:0031072 | heat shock protein binding                                                                      | 0.005473835   | 5            |
|                                      | GO:1901681 | sulfur compound binding                                                                         | 0.006939268   | 6            |
| cellular                             | GO:0045239 | tricarboxylic acid cycle enzyme complex                                                         | 1.72E-06      | 5            |
| component                            | GO:1990204 | oxidoreductase complex                                                                          | 1.72E-06      | 8            |
|                                      | GO:0030312 | external encapsulating structure                                                                | 0.000566564   | 8            |
|                                      | GO:0031012 | extracellular matrix                                                                            | 0.000566564   | 8            |
|                                      | GO:0042383 | sarcolemma                                                                                      | 0.000974441   | 6            |
|                                      | GO:0009295 | nucleoid                                                                                        | 0.001066259   | 4            |
|                                      | GO:0042645 | mitochondrial nucleoid                                                                          | 0.001066259   | 4            |
|                                      | GO:0005759 | mitochondrial matrix                                                                            | 0.001163166   | 9            |
|                                      | GO:0005788 | endoplasmic reticulum lumen                                                                     | 0.001228406   | 7            |
|                                      | GO:0045171 | intercellular bridge                                                                            | 0.001669443   | 4            |
| <b>Ontology</b>                      | <b>ID</b>  | <b>Description</b>                                                                              | <b>qvalue</b> | <b>Count</b> |
| <b>antagomir430a vs. antagomirNC</b> |            |                                                                                                 |               |              |
| biological                           | GO:0016056 | rhodopsin mediated signaling pathway                                                            | 5.75E-08      | 10           |
| process                              | GO:0008277 | regulation of G protein-coupled receptor signaling pathway                                      | 5.75E-08      | 24           |
|                                      | GO:0022400 | regulation of rhodopsin mediated signaling pathway                                              | 6.01E-08      | 9            |
|                                      | GO:0010612 | regulation of cardiac muscle adaptation                                                         | 6.72E-08      | 8            |
|                                      | GO:1903242 | regulation of cardiac muscle hypertrophy in response to stress                                  | 6.72E-08      | 8            |
|                                      | GO:0090343 | positive regulation of cell aging                                                               | 1.99E-07      | 8            |
|                                      | GO:0007602 | phototransduction                                                                               | 4.06E-07      | 11           |
|                                      | GO:0007603 | phototransduction, visible light                                                                | 5.62E-07      | 10           |
|                                      | GO:0007084 | mitotic nuclear envelope reassembly                                                             | 8.72E-07      | 8            |
|                                      | GO:0101024 | nuclear membrane organization involved in mitotic nuclear division                              | 8.72E-07      | 8            |
| molecular                            | GO:0008157 | protein phosphatase 1 binding                                                                   | 2.39E-11      | 12           |
| function                             | GO:0004712 | protein serine/threonine/tyrosine kinase activity                                               | 4.63E-07      | 10           |
|                                      | GO:0047555 | 3',5'-cyclic-GMP phosphodiesterase activity                                                     | 2.60E-06      | 7            |

|                                      | GO:0005201 | extracellular matrix structural constituent                                                                   | 4.39E-06    | 8     |
|--------------------------------------|------------|---------------------------------------------------------------------------------------------------------------|-------------|-------|
|                                      | GO:0099583 | neurotransmitter receptor activity involved in regulation of postsynaptic cytosolic calcium ion concentration | 7.61E-06    | 7     |
|                                      | GO:0003916 | DNA topoisomerase activity                                                                                    | 1.72E-05    | 6     |
|                                      | GO:0005221 | intracellular cyclic nucleotide activated cation channel activity                                             | 1.72E-05    | 6     |
|                                      | GO:0043855 | cyclic nucleotide-gated ion channel activity                                                                  | 1.72E-05    | 6     |
|                                      | GO:0015459 | potassium channel regulator activity                                                                          | 1.98E-05    | 10    |
|                                      | GO:0004857 | enzyme inhibitor activity                                                                                     | 0.000132121 | 22    |
| cellular component                   | GO:0005882 | intermediate filament                                                                                         | 1.16E-12    | 16    |
|                                      | GO:0045111 | intermediate filament cytoskeleton                                                                            | 7.05E-09    | 16    |
|                                      | GO:0005615 | extracellular space                                                                                           | 1.38E-08    | 47    |
|                                      | GO:0005652 | nuclear lamina                                                                                                | 2.52E-08    | 8     |
|                                      | GO:0005788 | endoplasmic reticulum lumen                                                                                   | 3.92E-08    | 22    |
|                                      | GO:0097381 | photoreceptor disc membrane                                                                                   | 7.58E-08    | 9     |
|                                      | GO:0042622 | photoreceptor outer segment membrane                                                                          | 6.01E-07    | 10    |
|                                      | GO:0060170 | ciliary membrane                                                                                              | 6.82E-05    | 12    |
|                                      | GO:0005834 | heterotrimeric G-protein complex                                                                              | 0.000119809 | 6     |
|                                      | GO:1905360 | GTPase complex                                                                                                | 0.000119809 | 6     |
| Ontology                             | ID         | Description                                                                                                   | qvalue      | Count |
| <b>antagomir430b vs. antagomirNC</b> |            |                                                                                                               |             |       |
| biological process                   | GO:0036292 | DNA rewinding                                                                                                 | 1.63E-12    | 12    |
|                                      | GO:0098884 | postsynaptic neurotransmitter receptor internalization                                                        | 1.63E-12    | 12    |
|                                      | GO:0099590 | neurotransmitter receptor internalization                                                                     | 1.63E-12    | 12    |
|                                      | GO:0140239 | postsynaptic endocytosis                                                                                      | 1.63E-12    | 12    |
|                                      | GO:1904978 | regulation of endosome organization                                                                           | 1.63E-12    | 12    |
|                                      | GO:1904980 | positive regulation of endosome organization                                                                  | 1.63E-12    | 12    |
|                                      | GO:1903423 | positive regulation of synaptic vesicle recycling                                                             | 8.01E-12    | 13    |
|                                      | GO:1903421 | regulation of synaptic vesicle recycling                                                                      | 1.43E-09    | 13    |
|                                      | GO:0000733 | DNA strand renaturation                                                                                       | 1.56E-09    | 12    |
|                                      | GO:0048478 | replication fork protection                                                                                   | 1.28E-08    | 12    |
| molecular function                   | GO:1990175 | EH domain binding                                                                                             | 1.83E-12    | 12    |
|                                      | GO:0043812 | phosphatidylinositol-4-phosphate phosphatase activity                                                         | 1.12E-11    | 12    |
|                                      | GO:0036310 | annealing helicase activity                                                                                   | 4.93E-11    | 12    |
|                                      | GO:0004520 | endodeoxyribonuclease activity                                                                                | 3.53E-10    | 14    |
|                                      | GO:0070530 | K63-linked polyubiquitin modification-dependent protein binding                                               | 5.25E-10    | 12    |
|                                      | GO:0004536 | deoxyribonuclease activity                                                                                    | 2.47E-09    | 15    |
|                                      | GO:0043813 | phosphatidylinositol-3,5-bisphosphate 5-                                                                      | 2.97E-09    | 12    |

|                               |            | phosphatase activity                                             |          |       |
|-------------------------------|------------|------------------------------------------------------------------|----------|-------|
|                               | GO:0097617 | annealing activity                                               | 2.97E-09 | 12    |
|                               | GO:0140097 | catalytic activity, acting on DNA                                | 5.41E-09 | 27    |
|                               | GO:0052658 | inositol-1,4,5-trisphosphate 5-phosphatase activity              | 1.43E-08 | 12    |
| cellular component            | GO:0030132 | clathrin coat of coated pit                                      | 4.04E-13 | 14    |
|                               | GO:0005882 | intermediate filament                                            | 1.14E-11 | 18    |
|                               | GO:0045111 | intermediate filament cytoskeleton                               | 2.85E-07 | 18    |
|                               | GO:0005615 | extracellular space                                              | 7.53E-07 | 62    |
|                               | GO:0097060 | synaptic membrane                                                | 1.51E-06 | 37    |
|                               | GO:0005652 | nuclear lamina                                                   | 1.56E-06 | 8     |
|                               | GO:0097381 | photoreceptor disc membrane                                      | 9.17E-06 | 9     |
|                               | GO:0043596 | nuclear replication fork                                         | 9.57E-06 | 13    |
|                               | GO:0043679 | axon terminus                                                    | 1.42E-05 | 28    |
|                               | GO:0043195 | terminal bouton                                                  | 1.42E-05 | 23    |
| Ontology                      | ID         | Description                                                      | qvalue   | Count |
| antagomir430c vs. antagomirNC |            |                                                                  |          |       |
| biological process            | GO:0003299 | muscle hypertrophy in response to stress                         | 4.44E-14 | 18    |
|                               | GO:0014887 | cardiac muscle adaptation                                        | 4.44E-14 | 18    |
|                               | GO:0014898 | cardiac muscle hypertrophy in response to stress                 | 4.44E-14 | 18    |
|                               | GO:0003300 | cardiac muscle hypertrophy                                       | 2.95E-12 | 25    |
|                               | GO:0014897 | striated muscle hypertrophy                                      | 3.33E-12 | 25    |
|                               | GO:0014896 | muscle hypertrophy                                               | 3.88E-12 | 25    |
|                               | GO:0007215 | glutamate receptor signaling pathway                             | 1.22E-11 | 24    |
|                               | GO:0014888 | striated muscle adaptation                                       | 1.33E-11 | 20    |
|                               | GO:0090201 | negative regulation of release of cytochrome c from mitochondria | 1.44E-11 | 15    |
|                               | GO:0055012 | ventricular cardiac muscle cell differentiation                  | 2.13E-11 | 17    |
| molecular function            | GO:0071837 | HMG box domain binding                                           | 5.10E-12 | 11    |
|                               | GO:0008157 | protein phosphatase 1 binding                                    | 1.41E-10 | 12    |
|                               | GO:0003680 | AT DNA binding                                                   | 3.83E-09 | 9     |
|                               | GO:0015605 | organophosphate ester transmembrane transporter activity         | 1.28E-08 | 11    |
|                               | GO:0004712 | protein serine/threonine/tyrosine kinase activity                | 7.31E-08 | 11    |
|                               | GO:0047555 | 3',5'-cyclic-GMP phosphodiesterase activity                      | 5.38E-06 | 7     |
|                               | GO:1990782 | protein tyrosine kinase binding                                  | 5.53E-06 | 13    |
|                               | GO:0008289 | lipid binding                                                    | 2.13E-05 | 35    |
|                               | GO:0015026 | coreceptor activity                                              | 5.13E-05 | 6     |
|                               | GO:0047144 | 2-acylglycerol-3-phosphate O-acyltransferase activity            | 9.76E-05 | 6     |

| cellular                            | GO:0005882 | intermediate filament                                                    | 3.66E-12    | 17    |
|-------------------------------------|------------|--------------------------------------------------------------------------|-------------|-------|
| component                           | GO:0045111 | intermediate filament cytoskeleton                                       | 4.02E-08    | 17    |
|                                     | GO:0005652 | nuclear lamina                                                           | 2.90E-07    | 8     |
|                                     | GO:0030016 | myofibril                                                                | 4.50E-07    | 26    |
|                                     | GO:0097381 | photoreceptor disc membrane                                              | 9.75E-07    | 9     |
|                                     | GO:0099081 | supramolecular polymer                                                   | 1.37E-06    | 43    |
|                                     | GO:0099512 | supramolecular fiber                                                     | 1.37E-06    | 43    |
|                                     | GO:0043292 | contractile fiber                                                        | 1.98E-06    | 26    |
|                                     | GO:0044291 | cell-cell contact zone                                                   | 2.01E-06    | 13    |
|                                     | GO:0030017 | sarcomere                                                                | 8.60E-06    | 21    |
| Ontology                            | ID         | Description                                                              | qvalue      | Count |
| <b>antagomir430a vs. agomir430a</b> |            |                                                                          |             |       |
| biological                          | GO:0002931 | response to ischemia                                                     | 5.03E-18    | 22    |
| process                             | GO:0031554 | regulation of DNA-templated transcription, termination                   | 2.46E-14    | 11    |
|                                     | GO:0051941 | regulation of amino acid uptake involved in synaptic transmission        | 2.46E-14    | 11    |
|                                     | GO:0051946 | regulation of glutamate uptake involved in transmission of nerve impulse | 2.46E-14    | 11    |
|                                     | GO:0060567 | negative regulation of DNA-templated transcription, termination          | 2.46E-14    | 11    |
|                                     | GO:0032835 | glomerulus development                                                   | 2.05E-13    | 22    |
|                                     | GO:0097167 | circadian regulation of translation                                      | 2.05E-13    | 11    |
|                                     | GO:0035983 | response to trichostatin A                                               | 3.75E-13    | 10    |
|                                     | GO:0035984 | cellular response to trichostatin A                                      | 3.75E-13    | 10    |
|                                     | GO:2001016 | positive regulation of skeletal muscle cell differentiation              | 3.75E-13    | 10    |
| molecular<br>function               | GO:1990226 | histone methyltransferase binding                                        | 3.65E-12    | 11    |
|                                     | GO:0042826 | histone deacetylase binding                                              | 3.65E-12    | 23    |
|                                     | GO:0001222 | transcription corepressor binding                                        | 7.19E-11    | 11    |
|                                     | GO:0003680 | AT DNA binding                                                           | 2.43E-10    | 9     |
|                                     | GO:0071837 | HMG box domain binding                                                   | 7.56E-10    | 9     |
|                                     | GO:0015248 | sterol transporter activity                                              | 7.35E-09    | 10    |
|                                     | GO:0036002 | pre-mRNA binding                                                         | 2.38E-08    | 11    |
|                                     | GO:0001221 | transcription cofactor binding                                           | 1.20E-07    | 11    |
|                                     | GO:0004497 | monooxygenase activity                                                   | 2.27E-07    | 10    |
|                                     | GO:0005095 | GTPase inhibitor activity                                                | 4.87E-07    | 7     |
| cellular<br>component               | GO:0030485 | smooth muscle contractile fiber                                          | 4.79E-10    | 10    |
|                                     | GO:0031092 | platelet alpha granule membrane                                          | 6.97E-10    | 10    |
|                                     | GO:0097038 | perinuclear endoplasmic reticulum                                        | 1.08E-09    | 9     |
|                                     | GO:0031091 | platelet alpha granule                                                   | 4.07E-05    | 11    |
|                                     | GO:0030667 | secretory granule membrane                                               | 5.72E-05    | 18    |
|                                     | GO:0043292 | contractile fiber                                                        | 0.000161262 | 19    |
|                                     | GO:0099081 | supramolecular polymer                                                   | 0.000307435 | 30    |

|                                     | GO:0099512 | supramolecular fiber                                                                  | 0.000307435 | 30    |
|-------------------------------------|------------|---------------------------------------------------------------------------------------|-------------|-------|
|                                     | GO:0005790 | smooth endoplasmic reticulum                                                          | 0.001207213 | 6     |
|                                     | GO:0048471 | perinuclear region of cytoplasm                                                       | 0.001670913 | 32    |
| Ontology                            | ID         | Description                                                                           | qvalue      | Count |
| <b>antagomir430b vs. agomir430b</b> |            |                                                                                       |             |       |
| biological<br>process               | GO:0055001 | muscle cell development                                                               | 6.86E-20    | 48    |
|                                     | GO:0055002 | striated muscle cell development                                                      | 6.86E-20    | 47    |
|                                     | GO:0030239 | myofibril assembly                                                                    | 8.45E-16    | 30    |
|                                     | GO:0042692 | muscle cell differentiation                                                           | 1.67E-15    | 57    |
|                                     | GO:0061061 | muscle structure development                                                          | 7.50E-14    | 66    |
|                                     | GO:0098884 | postsynaptic neurotransmitter receptor<br>internalization                             | 7.50E-14    | 12    |
|                                     | GO:0099590 | neurotransmitter receptor internalization                                             | 7.50E-14    | 12    |
|                                     | GO:0140239 | postsynaptic endocytosis                                                              | 7.50E-14    | 12    |
|                                     | GO:1904978 | regulation of endosome organization                                                   | 7.50E-14    | 12    |
|                                     | GO:1904980 | positive regulation of endosome<br>organization                                       | 7.50E-14    | 12    |
| molecular<br>function               | GO:1990175 | EH domain binding                                                                     | 1.70E-13    | 12    |
|                                     | GO:0043812 | phosphatidylinositol-4-phosphate<br>phosphatase activity                              | 1.05E-12    | 12    |
|                                     | GO:0016638 | oxidoreductase activity, acting on the CH-<br>NH2 group of donors                     | 7.74E-11    | 11    |
|                                     | GO:0043813 | phosphatidylinositol-3,5-bisphosphate 5-<br>phosphatase activity                      | 5.90E-10    | 12    |
|                                     | GO:0016641 | oxidoreductase activity, acting on the CH-<br>NH2 group of donors, oxygen as acceptor | 6.30E-10    | 10    |
|                                     | GO:0071837 | HMG box domain binding                                                                | 6.30E-10    | 10    |
|                                     | GO:0052658 | inositol-1,4,5-trisphosphate 5-phosphatase<br>activity                                | 2.07E-09    | 12    |
|                                     | GO:0003680 | AT DNA binding                                                                        | 6.14E-09    | 9     |
|                                     | GO:0052629 | phosphatidylinositol-3,5-bisphosphate 3-<br>phosphatase activity                      | 6.14E-09    | 12    |
|                                     | GO:0052659 | inositol-1,3,4,5-tetrakisphosphate 5-<br>phosphatase activity                         | 6.14E-09    | 12    |
| cellular<br>component               | GO:0030017 | sarcomere                                                                             | 3.45E-20    | 41    |
|                                     | GO:0099081 | supramolecular polymer                                                                | 2.03E-19    | 69    |
|                                     | GO:0099512 | supramolecular fiber                                                                  | 2.03E-19    | 69    |
|                                     | GO:0030016 | myofibril                                                                             | 2.53E-18    | 42    |
|                                     | GO:0043292 | contractile fiber                                                                     | 2.75E-18    | 44    |
|                                     | GO:0031674 | I band                                                                                | 3.10E-12    | 25    |
|                                     | GO:0030132 | clathrin coat of coated pit                                                           | 2.14E-11    | 12    |
|                                     | GO:0030018 | Z disc                                                                                | 2.56E-11    | 23    |
|                                     | GO:0005911 | cell-cell junction                                                                    | 3.09E-09    | 49    |
|                                     | GO:0070161 | anchoring junction                                                                    | 3.09E-09    | 49    |



| Ontology                            | ID         | Description                                                                                     | qvalue   | Count |
|-------------------------------------|------------|-------------------------------------------------------------------------------------------------|----------|-------|
| <b>antagomir430c vs. agomir430c</b> |            |                                                                                                 |          |       |
| biological<br>process               | GO:0030239 | myofibril assembly                                                                              | 1.67E-14 | 46    |
|                                     | GO:0055002 | striated muscle cell development                                                                | 1.67E-14 | 71    |
|                                     | GO:0070848 | response to growth factor                                                                       | 1.67E-14 | 135   |
|                                     | GO:0071363 | cellular response to growth factor stimulus                                                     | 1.67E-14 | 133   |
|                                     | GO:0055001 | muscle cell development                                                                         | 1.67E-14 | 72    |
|                                     | GO:0030220 | platelet formation                                                                              | 1.99E-14 | 23    |
|                                     | GO:0072010 | glomerular epithelium development                                                               | 7.17E-14 | 27    |
|                                     | GO:0036344 | platelet morphogenesis                                                                          | 4.94E-13 | 24    |
|                                     | GO:0072160 | nephron tubule epithelial cell differentiation                                                  | 4.94E-13 | 24    |
|                                     | GO:0014706 | striated muscle tissue development                                                              | 2.23E-12 | 94    |
| molecular<br>function               | GO:0042805 | actinin binding                                                                                 | 4.93E-12 | 28    |
|                                     | GO:0000976 | transcription regulatory region sequence-specific DNA binding                                   | 6.09E-10 | 133   |
|                                     | GO:0000977 | RNA polymerase II regulatory region sequence-specific DNA binding                               | 1.98E-08 | 122   |
|                                     | GO:0004879 | nuclear receptor activity                                                                       | 2.60E-07 | 26    |
|                                     | GO:0098531 | transcription factor activity, direct ligand regulated sequence-specific DNA binding            | 2.60E-07 | 26    |
|                                     | GO:0042826 | histone deacetylase binding                                                                     | 3.22E-07 | 37    |
|                                     | GO:0016316 | phosphatidylinositol-3,4-bisphosphate 4-phosphatase activity                                    | 3.99E-07 | 10    |
|                                     | GO:0017161 | inositol-1,3,4-trisphosphate 4-phosphatase activity                                             | 3.99E-07 | 10    |
|                                     | GO:0052828 | inositol-3,4-bisphosphate 4-phosphatase activity                                                | 3.99E-07 | 10    |
|                                     | GO:0001216 | bacterial-type RNA polymerase transcriptional activator activity, sequence-specific DNA binding | 8.03E-07 | 84    |
| cellular<br>component               | GO:0043292 | contractile fiber                                                                               | 5.31E-19 | 77    |
|                                     | GO:0030017 | sarcomere                                                                                       | 5.34E-18 | 63    |
|                                     | GO:0030016 | myofibril                                                                                       | 9.22E-16 | 67    |
|                                     | GO:0031674 | I band                                                                                          | 4.72E-14 | 43    |
|                                     | GO:0030018 | Z disc                                                                                          | 4.72E-14 | 41    |
|                                     | GO:0099081 | supramolecular polymer                                                                          | 4.48E-11 | 110   |
|                                     | GO:0099512 | supramolecular fiber                                                                            | 4.48E-11 | 110   |
|                                     | GO:0071914 | prominosome                                                                                     | 4.25E-10 | 15    |
|                                     | GO:0070062 | extracellular exosome                                                                           | 1.42E-08 | 31    |
|                                     | GO:1903561 | extracellular vesicle                                                                           | 3.45E-08 | 31    |

Table S4 Significant KEGG enrichment among the DEGs.

Using *P* value to determine the significant value of the collected GO clusters, 0.05 represents significant significance. n=3 for each microinjection group.

| <b>KEGG pathways significantly enriched by DEGs of agomir430a vs. agomirNC</b>       |            |             |                |
|--------------------------------------------------------------------------------------|------------|-------------|----------------|
| <b>Pathway</b>                                                                       | <b>map</b> | <b>DEGs</b> | <b>p value</b> |
| Steroid biosynthesis                                                                 | malb00100  | 3           | 0.00044426257  |
| Metabolic pathways                                                                   | malb01100  | 19          | 0.00764973655  |
| Starch and sucrose metabolism                                                        | malb00500  | 2           | 0.0365232931   |
| Arachidonic acid metabolism                                                          | malb00590  | 2           | 0.0452261636   |
| <b>KEGG pathways significantly enriched by DEGs of agomir430b vs. agomirNC</b>       |            |             |                |
| <b>Pathway</b>                                                                       | <b>map</b> | <b>DEGs</b> | <b>p value</b> |
| MAPK signaling pathway                                                               | malb04010  | 17          | 0.0000392105   |
| Protein processing in endoplasmic reticulum                                          | malb04141  | 10          | 0.0004427799   |
| C-type lectin receptor signaling pathway                                             | malb04625  | 7           | 0.00201509974  |
| Arachidonic acid metabolism                                                          | malb00590  | 4           | 0.005539994999 |
| NOD-like receptor signaling pathway                                                  | malb04621  | 6           | 0.0204830636   |
| Necroptosis                                                                          | malb04217  | 6           | 0.023259437    |
| Spliceosome                                                                          | malb03040  | 5           | 0.0405685793   |
| Histidine metabolism                                                                 | malb00340  | 2           | 0.0426180703   |
| Toll-like receptor signaling pathway                                                 | malb04620  | 4           | 0.0474010918   |
| <b>KEGG pathways significantly enriched by DEGs of agomir430c vs. agomirNC</b>       |            |             |                |
| <b>Pathway</b>                                                                       | <b>map</b> | <b>DEGs</b> | <b>p value</b> |
| Linoleic acid metabolism                                                             | malb00591  | 3           | 0.001816139    |
| Thiamine metabolism                                                                  | malb00730  | 2           | 0.01090177     |
| Retinol metabolism                                                                   | malb00830  | 3           | 0.015018061    |
| Glutathione metabolism                                                               | malb00480  | 3           | 0.02243419     |
| Pyrimidine metabolism                                                                | malb00240  | 3           | 0.029350102    |
| Folate biosynthesis                                                                  | malb00790  | 2           | 0.030235956    |
| Tight junction                                                                       | malb04530  | 6           | 0.042194682    |
| beta-Alanine metabolism                                                              | malb00410  | 2           | 0.042721643    |
| MAPK signaling pathway                                                               | malb04010  | 8           | 0.046248662    |
| <b>KEGG pathways significantly enriched by DEGs of antagomir430a vs. antagomirNC</b> |            |             |                |
| <b>Pathway</b>                                                                       | <b>map</b> | <b>DEGs</b> | <b>p value</b> |
| Phototransduction                                                                    | malb04744  | 9           | 9.89E-05       |
| ECM-receptor interaction                                                             | malb04512  | 13          | 0.000742289    |
| Tryptophan metabolism                                                                | malb00380  | 8           | 0.001078035    |
| Apelin signaling pathway                                                             | malb04371  | 17          | 0.002950159    |
| Cardiac muscle contraction                                                           | malb04260  | 13          | 0.003451457    |
| Notch signaling pathway                                                              | malb04330  | 9           | 0.00451846     |
| Metabolic pathways                                                                   | malb01100  | 88          | 0.005191951    |
| Adrenergic signaling in cardiomyocytes                                               | malb04261  | 18          | 0.009234105    |
| Nitrogen metabolism                                                                  | malb00910  | 4           | 0.011138489    |
| Alanine, aspartate and glutamate metabolism                                          | malb00250  | 6           | 0.016480823    |

|                                        |           |    |             |
|----------------------------------------|-----------|----|-------------|
| Prophyrin and chlorophyll metabolism   | malb00860 | 5  | 0.016921894 |
| Arginine biosynthesis                  | malb00220 | 4  | 0.022108979 |
| Drug metabolism - other enzymes        | malb00983 | 7  | 0.02644337  |
| PPAR signaling pathway                 | malb03320 | 8  | 0.029958882 |
| Calcium signaling pathway              | malb04020 | 19 | 0.030181176 |
| Ferroptosis                            | malb04216 | 6  | 0.035328767 |
| Cytokine-cytokine receptor interaction | malb04060 | 15 | 0.03937936  |
| Focal adhesion                         | malb04510 | 18 | 0.041670637 |
| Fructose and mannose metabolism        | malb00051 | 5  | 0.044083778 |

**KEGG pathways significantly enriched by DEGs of antagomir430b vs. antagomirNC**

| Pathway                                      | map       | DEGs | p value     |
|----------------------------------------------|-----------|------|-------------|
| Cardiac muscle contraction                   | malb04260 | 27   | 1.22E-06    |
| Drug metabolism - other enzymes              | malb00983 | 16   | 5.74E-05    |
| Adrenergic signaling in cardiomyocytes       | malb04261 | 32   | 0.000269644 |
| Steroid biosynthesis                         | malb00100 | 8    | 0.000304558 |
| Steroid hormone biosynthesis                 | malb00140 | 12   | 0.000404661 |
| Metabolic pathways                           | malb01100 | 142  | 0.001468612 |
| Pyrimidine metabolism                        | malb00240 | 13   | 0.001503822 |
| PPAR signaling pathway                       | malb03320 | 15   | 0.00152742  |
| Tryptophan metabolism                        | malb00380 | 10   | 0.002280213 |
| Arginine biosynthesis                        | malb00220 | 7    | 0.002591061 |
| Alanine, aspartate and glutamate metabolism  | malb00250 | 10   | 0.002612997 |
| Nitrogen metabolism                          | malb00910 | 6    | 0.003770627 |
| Phototransduction                            | malb04744 | 8    | 0.009315894 |
| Retinol metabolism                           | malb00830 | 9    | 0.013195618 |
| Neuroactive ligand-receptor interaction      | malb04080 | 49   | 0.014673913 |
| ECM-receptor interaction                     | malb04512 | 14   | 0.018014478 |
| Metabolism of xenobiotics by cytochrome P450 | malb00980 | 7    | 0.020908087 |
| Adipocytokine signaling pathway              | malb04920 | 13   | 0.022966178 |
| Pantothenate and CoA biosynthesis            | malb00770 | 4    | 0.023129897 |
| Drug metabolism - cytochrome P450            | malb00982 | 7    | 0.023369916 |
| Purine metabolism                            | malb00230 | 19   | 0.029739991 |
| beta-Alanine metabolism                      | malb00410 | 6    | 0.033037439 |
| Biosynthesis of amino acids                  | malb01230 | 11   | 0.035171034 |
| Calcium signaling pathway                    | malb04020 | 28   | 0.038279632 |
| ABC transporters                             | malb02010 | 7    | 0.038677602 |

**KEGG pathways significantly enriched by DEGs of antagomir430c vs. antagomirNC**

| Pathway                                | map       | DEGs | p value     |
|----------------------------------------|-----------|------|-------------|
| Cardiac muscle contraction             | malb04260 | 23   | 3.70E-07    |
| ECM-receptor interaction               | malb04512 | 16   | 0.000136255 |
| Adrenergic signaling in cardiomyocytes | malb04261 | 25   | 0.00031513  |
| Notch signaling pathway                | malb04330 | 12   | 0.000460756 |
| Apelin signaling pathway               | malb04371 | 21   | 0.000642066 |
| Tight junction                         | malb04530 | 25   | 0.001633437 |

|                                         |           |    |             |
|-----------------------------------------|-----------|----|-------------|
| Focal adhesion                          | malb04510 | 26 | 0.001645582 |
| Glycerolipid metabolism                 | malb00561 | 11 | 0.001968871 |
| Pyrimidine metabolism                   | malb00240 | 10 | 0.002800079 |
| Phototransduction                       | malb04744 | 7  | 0.005112265 |
| Calcium signaling pathway               | malb04020 | 24 | 0.008335046 |
| Cell adhesion molecules (CAMs)          | malb04514 | 18 | 0.008940984 |
| Porphyrin and chlorophyll metabolism    | malb00860 | 6  | 0.008997557 |
| Metabolic pathways                      | malb01100 | 99 | 0.011734746 |
| Apoptosis                               | malb04210 | 16 | 0.022895353 |
| Biosynthesis of unsaturated fatty acids | malb01040 | 5  | 0.041087722 |
| Nicotinate and nicotinamide metabolism  | malb00760 | 5  | 0.041087722 |

**KEGG pathways significantly enriched by DEGs of antagomir430a vs. agomir430a**

| Pathway                                             | map       | DEGs | p value     |
|-----------------------------------------------------|-----------|------|-------------|
| Ubiquinone and other terpenoid-quinone biosynthesis | malb00130 | 4    | 0.001639767 |
| ECM-receptor interaction                            | malb04512 | 11   | 0.001905114 |
| Biosynthesis of unsaturated fatty acids             | malb01040 | 6    | 0.002916499 |
| Metabolism of xenobiotics by cytochrome P450        | malb00980 | 6    | 0.003283144 |
| Steroid hormone biosynthesis                        | malb00140 | 6    | 0.010785374 |
| Tyrosine metabolism                                 | malb00350 | 5    | 0.019910623 |
| Metabolic pathways                                  | malb01100 | 72   | 0.024975814 |
| Phenylalanine metabolism                            | malb00360 | 3    | 0.027814547 |
| Vitamin B6 metabolism                               | malb00750 | 2    | 0.034418306 |
| Nitrogen metabolism                                 | malb00910 | 3    | 0.035775339 |
| Fatty acid elongation                               | malb00062 | 4    | 0.043877112 |
| Steroid biosynthesis                                | malb00100 | 3    | 0.044776685 |
| Base excision repair                                | malb03410 | 4    | 0.047383004 |

**KEGG pathways significantly enriched by DEGs of antagomir430b vs. agomir430b**

| Pathway                                              | map       | DEGs | p value     |
|------------------------------------------------------|-----------|------|-------------|
| Focal adhesion                                       | malb04510 | 44   | 1.09E-10    |
| ECM-receptor interaction                             | malb04512 | 23   | 2.22E-08    |
| MAPK signaling pathway                               | malb04010 | 46   | 6.88E-07    |
| Glycolysis / Gluconeogenesis                         | malb00010 | 13   | 0.000549043 |
| Regulation of actin cytoskeleton                     | malb04810 | 28   | 0.000583536 |
| AGE-RAGE signaling pathway in diabetic complications | malb04933 | 18   | 0.000872982 |
| Cardiac muscle contraction                           | malb04260 | 15   | 0.002485621 |
| C-type lectin receptor signaling pathway             | malb04625 | 15   | 0.00324299  |
| Adrenergic signaling in cardiomyocytes               | malb04261 | 22   | 0.003455064 |
| Tight junction                                       | malb04530 | 24   | 0.003652087 |
| Carbon metabolism                                    | malb01200 | 15   | 0.004725827 |
| Pentose phosphate pathway                            | malb00030 | 7    | 0.005378247 |
| Insulin signaling pathway                            | malb04910 | 18   | 0.00548498  |
| Apoptosis                                            | malb04210 | 18   | 0.006377911 |
| ErbB signaling pathway                               | malb04012 | 13   | 0.006542007 |

|                                          |           |    |             |
|------------------------------------------|-----------|----|-------------|
| Histidine metabolism                     | malb00340 | 5  | 0.009654529 |
| Salmonella infection                     | malb05132 | 10 | 0.014707035 |
| Glycerolipid metabolism                  | malb00561 | 9  | 0.016098175 |
| Wnt signaling pathway                    | malb04310 | 18 | 0.01711892  |
| Biosynthesis of amino acids              | malb01230 | 9  | 0.027275596 |
| Calcium signaling pathway                | malb04020 | 22 | 0.028105492 |
| RNA degradation                          | malb03018 | 9  | 0.032611284 |
| Glycine, serine and threonine metabolism | malb00260 | 6  | 0.03693205  |
| Necroptosis                              | malb04217 | 14 | 0.040370174 |
| Phagosome                                | malb04145 | 13 | 0.046859549 |
| Thiamine metabolism                      | malb00730 | 3  | 0.047284507 |
| Adherens junction                        | malb04520 | 11 | 0.049396371 |

| <b>KEGG pathways significantly enriched by DEGs of antagomir430c vs. agomir430c</b> |            |             |                |
|-------------------------------------------------------------------------------------|------------|-------------|----------------|
| <b>Pathway</b>                                                                      | <b>map</b> | <b>DEGs</b> | <b>p value</b> |
| Focal adhesion                                                                      | malb04510  | 80          | 2.53E-09       |
| ECM-receptor interaction                                                            | malb04512  | 38          | 1.10E-07       |
| Ribosome                                                                            | malb03010  | 38          | 7.06E-05       |
| MAPK signaling pathway                                                              | malb04010  | 90          | 0.000110822    |
| Cellular senescence                                                                 | malb04218  | 52          | 0.000591355    |
| Calcium signaling pathway                                                           | malb04020  | 73          | 0.001982638    |
| Cytokine-cytokine receptor interaction                                              | malb04060  | 50          | 0.002299178    |
| Cysteine and methionine metabolism                                                  | malb00270  | 17          | 0.003089777    |
| Regulation of actin cytoskeleton                                                    | malb04810  | 60          | 0.004003949    |
| Thiamine metabolism                                                                 | malb00730  | 7           | 0.00439706     |
| TGF-beta signaling pathway                                                          | malb04350  | 32          | 0.004436177    |
| Cardiac muscle contraction                                                          | malb04260  | 31          | 0.005764295    |
| Tight junction                                                                      | malb04530  | 54          | 0.008417078    |
| Adrenergic signaling in cardiomyocytes                                              | malb04261  | 48          | 0.009145155    |
| Tyrosine metabolism                                                                 | malb00350  | 12          | 0.015460561    |
| Apelin signaling pathway                                                            | malb04371  | 39          | 0.017057461    |
| ABC transporters                                                                    | malb02010  | 12          | 0.022776743    |
| FoxO signaling pathway                                                              | malb04068  | 40          | 0.026808131    |
| 2-Oxocarboxylic acid metabolism                                                     | malb01210  | 7           | 0.034110126    |
| Biosynthesis of amino acids                                                         | malb01230  | 19          | 0.0394327      |
| Cell adhesion molecules                                                             | malb04514  | 39          | 0.040818826    |
| Melanogenesis                                                                       | malb04916  | 29          | 0.055688496    |
| Phenylalanine metabolism                                                            | malb00360  | 5           | 0.089395287    |
| Adherens junction                                                                   | malb04520  | 24          | 0.096363946    |
| Vascular smooth muscle contraction                                                  | malb04270  | 33          | 0.099185464    |
| Endocytosis                                                                         | malb04144  | 59          | 0.112018869    |
| Glycosphingolipid biosynthesis - lacto and neolacto series                          | malb00601  | 8           | 0.112175222    |
| p53 signaling pathway                                                               | malb04115  | 19          | 0.114533993    |
| Tryptophan metabolism                                                               | malb00380  | 10          | 0.120082573    |

|                                                     |           |    |             |
|-----------------------------------------------------|-----------|----|-------------|
| Necroptosis                                         | malb04217 | 31 | 0.123448035 |
| ErbB signaling pathway                              | malb04012 | 22 | 0.123527747 |
| Adipocytokine signaling pathway                     | malb04920 | 19 | 0.124062783 |
| Starch and sucrose metabolism                       | malb00500 | 9  | 0.124687236 |
| Citrate cycle (TCA cycle)                           | malb00020 | 8  | 0.14701619  |
| Alanine                                             | malb00250 | 10 | 45/6578     |
| Nitrogen metabolism                                 | malb00910 | 5  | 0.161303821 |
| Gap junction                                        | malb04540 | 22 | 0.172877332 |
| VEGF signaling pathway                              | malb04370 | 15 | 0.179754464 |
| Wnt signaling pathway                               | malb04310 | 39 | 0.189744606 |
| Hedgehog signaling pathway                          | malb04340 | 13 | 0.201632559 |
| Insulin signaling pathway                           | malb04910 | 32 | 0.20929526  |
| Mucin type O-glycan biosynthesis                    | malb00512 | 8  | 0.22983908  |
| Glyoxylate and dicarboxylate metabolism             | malb00630 | 8  | 0.22983908  |
| Lysine degradation                                  | malb00310 | 14 | 0.236945311 |
| GnRH signaling pathway                              | malb04912 | 22 | 0.256668033 |
| Intestinal immune network for IgA production        | malb04672 | 6  | 0.262148525 |
| Arginine biosynthesis                               | malb00220 | 5  | 0.281322886 |
| Ubiquinone and other terpenoid-quinone biosynthesis | malb00130 | 3  | 0.283220439 |
| Other types of O-glycan biosynthesis                | malb00514 | 10 | 0.283255315 |

DEG, differentially expressed gene.

Table S5 Primers used for real-time PCR analysis.

| Gene            | GenBank<br>accession No. | Forward primer (5'-3') | Reverse primer (5'-3') |
|-----------------|--------------------------|------------------------|------------------------|
| <i>18s rRNA</i> | LC151290                 | GCTCGTAGTTGGATCTCGGG   | ACCTCTAGCGGCACAATACG   |
| <i>efla</i>     | KC011266                 | ATTGATGCCCCTGGACACAG   | TGTAGGCGCTCACTTCCTTG   |
| <i>gapdh</i>    | XM_020610927             | CTTCCTGCACAACCAACTGC   | TTGCCGTTGAGCTCAGGAAT   |
| <i>β-actin</i>  | AY345056                 | TCAACACGCCTGCCATGTAT   | CGCTCAGCTGTGGTAGTGAA   |
| <i>hprt</i>     | DQ218476                 | TTTGTGGTGGGATATGCGCT   | CTGTCAGGATTGTCGCCACT   |
| <i>rpl17</i>    | XM_020587712             | TCCCTTTCCGTCGCTACAAC   | CTCATCTTGGGGGCGCTTGTT  |
| <i>3β-hsd</i>   | XM_020586257             | GATGGGACCAAACCTCCAGGG  | ACGCATATGGCCCAAAAGGA   |
| <i>amh</i>      | KF770790                 | TCAGCAAAAGCAGCTTCCAC   | TTCCAAACAGCGCCAAACTG   |
| <i>ar</i>       | FJ471538                 | CCGTATGAGAGGAGCGTCAC   | TCTGCAGCTCGCTTGAAGAA   |
| <i>cyp11a1</i>  | XM_020619382             | CTGAAGCGGATTCCCTTGGT   | GGTCGATACTGCTCTGGACG   |
| <i>cyp17</i>    | AY224681                 | GGTCCCCCAAGCTTAGTGAC   | AGATAGCTGGGTGATGGGGT   |
| <i>cyp19a1a</i> | EU252487                 | AAAATGCTCCTCGCCGTTAC   | TCACCATGGCAATGTGCTTG   |
| <i>cyp19a1b</i> | EU252488                 | TCAATGCGAAGGACTTGCTG   | TGTTGCACAGCCATCCAATC   |
| <i>dax1</i>     | KF770791                 | CTGTTTTTCGTGAGTTGCCGG  | TGGCTTCGATTTCACGACA    |
| <i>dmrt1</i>    | AF421347                 | TCTCAGTACCGCATGCATTC   | TGTTGTTGTTGCTGCTGCTG   |
| <i>era</i>      | KM039134                 | AAATCGGAGGAAGAGCTGCC   | CTCCAGGTCCTTAGAGGCCT   |
| <i>erb</i>      | FJ873737                 | CCCTCACAGAGCAGAACTGG   | GGAATCTTCTTGGCCCAGCT   |

|                       |              |                                                    |                      |
|-----------------------|--------------|----------------------------------------------------|----------------------|
| <i>foxl2</i>          | KC470042     | GAGAAGCGCCTCACTCTCTC                               | AACAAGGACTTACCCGGCTG |
| <i>foxl3</i>          |              | GGGACAGGAAGGGCAACTAC                               | AGTGATGACCTGGTGTGCTG |
| <i>hsd11b2</i>        | XM_020602679 | CGGATCGTCACCATCTCCAG                               | TTGAACGCAGATGGCAGGAT |
| <i>hsd17b1</i>        | XM_020607406 | GAACGTTAGTGAGCTGGGCT                               | CAACCCTGTCCCTCACATCC |
| <i>hsd17b2</i>        | XM_020615849 | TGACTGACGGCTCCCAGATA                               | GCTCACGTTGATGATGCGTC |
| <i>hsd17b3</i>        | XM_020593846 | ATGCCACAGGACAGAAGGTG                               | ATTGTCTGCTCCAGGTCTGC |
| <i>hsd17b4</i>        | XM_020593869 | ACAGATGCCACCAAGCCTAC                               | ACCCCCAGTGCATAGAGGAT |
| <i>hsd17b7</i>        | XM_020585820 | CACCTTGATGTGGGCTCTGT                               | AACTTCCTGCAGACCGTCTG |
| <i>hsd17b8</i>        | XM_020587627 | CGATACTTCCAGCCTCCGTC                               | GGTTAAACCCTCCACTCCGG |
| <i>hsd17b10</i>       | XM_020586601 | ATGTGATTTCGCTTGCTGTG                               | ATCAAATGCTGCCACACTGG |
| <i>hsd17b12</i>       | XM_020623188 | ACATGACCTCAGTGTGCCAG                               | GAAAGGCAGCACGCTTTGAA |
| <i>hsd17b14</i>       | XM_020605399 | TTCCATGACAAAGGCGATGG                               | TTAATGGCAGCTGCAGCATC |
| <i>jnk</i>            | EF661977     | AAGGTGATCGAGCAGTTGGG                               | GCCTCGTCCACTGAGATACG |
| <i>sf-1</i>           | KJ131498     | AGCCTCTCATGCTGGTCTTA                               | CAGACAGACACAGCAGCAGA |
| <i>sox3</i>           | XM_020592532 | AAGTATTCTTTGCCCCGGGGG                              | CATCATCGGGTACTGGAGCC |
| <i>sox9</i>           | XM_020622629 | CGTCAGACAACCACCTCCTC                               | TTTTGCTGAGTTCCGCGTTG |
| <i>star</i>           | XM_020590513 | ATGGAGCAAATGGGGGAGTG                               | CTACACCCTTCTGCTCAGGC |
| <i>vasa</i>           | AY912131     | GCCAGGAAGTTTGCTTTGG                                | TGATTCTCTTTGGGCGGCAT |
| <i>wt1</i>            | KC015038     | GACACTGACCCTCACTGTGG                               | ACCGTGCTGTAACTGTCTG  |
| miR430a-<br>stem-loop |              | GTCGTATCCAGTGCAGGGTCCGAGGTATTCGCACTGGATACGACctaccc |                      |
| miR430b-<br>stem-loop |              | GTCGTATCCAGTGCAGGGTCCGAGGTATTCGCACTGGATACGACctaccc |                      |
| miR430c-<br>stem-loop |              | GTCGTATCCAGTGCAGGGTCCGAGGTATTCGCACTGGATACGACcaaccc |                      |
| miR-430a              |              | CGCGCTAAGTGCTATTTGTTG                              | GTGCAGGGTCCGAGGT     |
| miR-430b              |              | GCGCAAAGTGCTATCAAGTTG                              | GTGCAGGGTCCGAGGT     |
| miR-430c              |              | CGCGCTAAGTGCTTCTCTTTG                              | GTGCAGGGTCCGAGGT     |

Table S6 RNA sample purity and integrity.

“RIN” = RNA Integrity Number, A260/A280/A230 = RNA sample absorbances at wavelengths 260 nm, 280 nm, and 230 nm, respectively.

| Sample nuber  | RNA purity |          | RNA integrity |         |
|---------------|------------|----------|---------------|---------|
|               | A260/280   | A260/230 | RIN           | 28S/18S |
| agomirNC-1    | 2.1        | 1.7      | 10.0          | 1.8     |
| agomirNC -2   | 2.1        | 1.6      | 10.0          | 1.8     |
| agomirNC -3   | 2.1        | 1.6      | 10.0          | 1.8     |
| agomir430a-1  | 2.1        | 1.6      | 10.0          | 1.7     |
| agomir430a -2 | 2.1        | 1.9      | 10.0          | 1.7     |
| agomir430a -3 | 2.0        | 1.6      | 10.0          | 1.7     |
| agomir430b-1  | 1.9        | 2.2      | 10.0          | 1.8     |
| agomir430b-2  | 2.0        | 1.7      | 10.0          | 2.0     |

|                 |     |     |      |     |
|-----------------|-----|-----|------|-----|
| agomir430b-3    | 2.1 | 1.6 | 10.0 | 2.0 |
| agomir430c-1    | 2.0 | 1.7 | 10.0 | 1.9 |
| agomir430c-2    | 2.1 | 1.9 | 10.0 | 1.9 |
| agomir430c-3    | 2.0 | 1.7 | 10.0 | 2.0 |
| antagomirNC-1   | 2.1 | 1.2 | 9.6  | 1.4 |
| antagomirNC-2   | 2.1 | 1.4 | 10.0 | 1.6 |
| antagomirNC-3   | 2.1 | 0.7 | 10.0 | 1.6 |
| antagomir430a-1 | 2.2 | 0.6 | 9.1  | 1.4 |
| antagomir430a-2 | 2.2 | 0.8 | 10.0 | 1.6 |
| antagomir430a-3 | 2.2 | 1.0 | 10.0 | 1.6 |
| antagomir430b-1 | 2.1 | 1.4 | 9.9  | 1.5 |
| antagomir430b-2 | 2.1 | 1.2 | 10.0 | 1.6 |
| antagomir430b-3 | 2.1 | 0.9 | 10.0 | 1.5 |
| antagomir430c-1 | 2.1 | 0.7 | 10.0 | 1.5 |
| antagomir430c-2 | 2.1 | 1.6 | 10.0 | 1.5 |
| antagomir430c-3 | 2.2 | 1.3 | 10.0 | 1.6 |

Table S7 steroidogenesis-related gene expression in RNA-Seq.

| Gene            | FC/log2FC  |            |            |             |              |              |
|-----------------|------------|------------|------------|-------------|--------------|--------------|
|                 | T11 vs C1  | T12 vs C1  | T13 vs C1  | T21 vs C2   | T22 vs C2    | T23 vs C2    |
| <i>star</i>     | 1.01/0.01  | 0.80/-0.32 | 0.83/-0.27 | 0.36/-1.46* | 0.27/-1.88** | 0.66/-0.61   |
| <i>cyp17a1</i>  | 0.84/-0.26 | 0.50/-0.99 | 1.04/0.06  | 0.42/-1.27  | 0.74/-0.422  | 0.48/-1.07   |
| <i>sf-1</i>     | 0.61/-0.7  | 1.06/0.08  | 0.76/-0.40 | 0.69/-0.54  | 0.85/-0.24   | 0.69/-0.53   |
| <i>wt1</i>      | 0.93/-0.10 | 0.90/-0.15 | 1.10/0.14  | 0.82/-0.28  | 1.04/0.06    | 0.92/-0.12   |
| <i>cyp19a1a</i> | 0.23/-2.15 | 0.61/-0.71 | 1.66/0.73  | 0.53/-0.92  | 0.19/-2.42   | 0.24/-2.07   |
| <i>cyp19a1b</i> | 1.34/0.42  | 1.67/0.74* | 1.36/0.44  | 0.51/-0.96* | 0.46/-1.11   | 0.40/-1.32** |
| <i>sox3</i>     | 1.10/0.14  | 1.03/0.05  | 0.84/-0.26 | 1.34/0.42   | 1.21/0.27    | 1.17/0.23    |
| <i>jnk1</i>     | 0.98/-0.03 | 1.00/0.01  | 1.00/0.00  | 0.89/-0.16  | 1.16/0.21    | 1.10/0.13    |
| <i>foxl2</i>    | 0.88/-0.19 | 1.04/0.06  | 0.98/-0.03 | 1.40/0.48   | 1.28/0.35    | 1.44/0.52    |
| <i>dmrt1</i>    | 5.73/2.52  | 5.41/2.44  | 7.29/2.86  | 0.14/-2.79  | 0.14/-2.85   | 0.51/-0.96   |
| <i>amh</i>      | 1.13/0.18  | 1.01/0.02  | 0.88/-0.19 | 1.62/0.70   | 2.03/1.02    | 1.33/0.41    |



|                  |            |            |            |              |              |              |
|------------------|------------|------------|------------|--------------|--------------|--------------|
| <i>sox9</i>      | 0.92/-0.12 | 0.99/-0.02 | 0.92/-0.12 | 1.39/0.47    | 1.30/0.37    | 1.30/0.38    |
| <i>foxl3</i>     | 0.97/-0.04 | 0.98/-0.03 | 1.07/0.09  | 0.99/-0.01   | 1.48/0.57    | 1.06/0.08    |
| <i>dax1</i>      | 1.21/0.28  | 1.61/0.68  | 1.57/0.65  | 0.67/-0.58   | 0.43/-1.21** | 0.56/-0.84*  |
| <i>hsd17b14</i>  | 1.01/0.02  | 1.13/0.17  | 1.25/0.33  | 1.27/0.35    | 1.13/0.18    | 1.01/0.01    |
| <i>hsd17b1</i>   | 5.21/2.38  | 1.30/0.38  | 0.67/-0.58 | 0.41/-1.30   | 0.97/-0.04   | 0.61/-0.72   |
| <i>HSD17B7</i>   | 1.28/0.35  | 1.45/0.53  | 1.11/0.15  | 2.13/1.09*   | 2.25/1.17**  | 1.98/0.98*   |
| <i>3Beta_HSD</i> | 0.63/-0.67 | 0.79/-0.34 | 0.80/-0.32 | 0.56/-0.83*  | 0.72/-0.47   | 0.53/-0.91*  |
| <i>hsd17b12</i>  | 1.08/0.12  | 1.11/0.15  | 0.97/-0.20 | 0.46/-1.11** | 0.65/-0.62   | 0.35/-1.52** |
| <i>hsd17b10</i>  | 0.82/-0.28 | 0.98/-0.03 | 0.97/-0.04 | 0.95/-0.08   | 1.19/0.25    | 0.92/-0.12   |
| <i>hsd17b8</i>   | 1.29/0.37  | 0.76/-0.40 | 0.95/-0.07 | 1.39/0.47    | 1.01/0.01    | 1.41/0.50    |
| <i>hsd17b2</i>   | 1.53/0.61* | 1.21/0.27  | 0.97/-0.05 | 0.56/-0.84*  | 0.60/-0.75*  | 1.01/0.02    |
| <i>hsd17b3</i>   | 1.66/0.73  | 0.52/-0.93 | 0.55/-0.87 | 0.19/-2.43   | 0.08/-3.67** | 0.20/-2.35** |
| <i>hsd17b4</i>   | 0.90/-0.15 | 0.99/-0.01 | 1.12/0.08  | 1.02/0.03    | 0.95/-0.08   | 0.96/-0.05   |
| <i>hsd11b2</i>   | 0.97/-0.05 | 0.97/-0.05 | 1.05/0.08  | 0.82/-0.29   | 0.77/-0.39   | 0.78/-0.35   |
| <i>cyp11a1</i>   | 1.05/0.07  | 0.73/-0.46 | 1.01/0.01  | 0.68/-0.56   | 0.80/-0.32   | 1.48/0.56    |
| <i>era</i>       | 0.96/-0.06 | 0.82/-0.29 | 1.05/0.07  | 0.86/-0.21   | 1.50/0.58    | 1.17/0.22    |
| <i>erb</i>       | 1.20/0.27  | 1.01/0.02  | 1.19/0.25  | 0.79/-0.34   | 0.98/-0.03   | 0.70/-0.52   |
| <i>ar</i>        | 0.84/-0.26 | 1.08/0.11  | 1.07/0.10  | 0.78/-0.35   | 0.56/-0.84   | 0.65/-0.63   |
| <i>vasa</i>      | 0.86/-0.22 | 0.88/-0.19 | 0.96/-0.06 | 0.33/-1.59*  | 0.59/-0.77   | 0.42/-1.25*  |

Note: FC, FoldChange; log2FC, log2Foldchange. \* represented FC>1.5 and  $P<0.05$ ; \*\* represented FC>1.5,  $P<0.05$  and FDR-adjusted  $P<0.05$ .

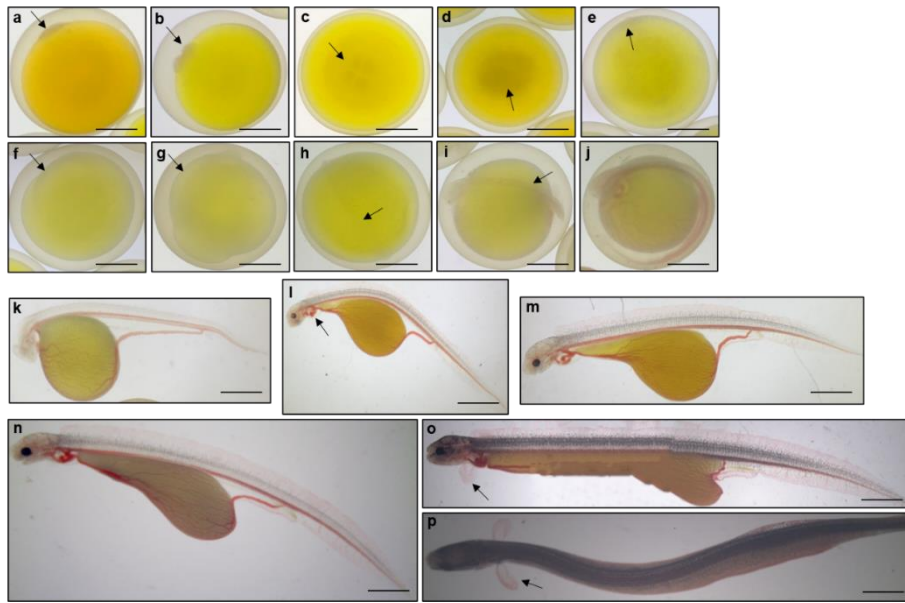

Figure S1. External appearance of *M. albus* embryos in different periods. (a) zygote: blastodisc formation; (b, c) cleavage: 2-cell, 4-cell; (d) blastula stage; (e, f, g, h, i) gastrula: shield, gastrula telophase, neurula metaphase, blastopore closing, tail bud formation; (j, k) hatching prophase: 4 d after fertilization; (l, m, n, o, p) hatching: hatching (newly hatching fry), 1 d after hatching, 2 d after hatching, 4 d after hatching, 6 d after hatching. The arrows represented (a-e) blastodermal cells, (f-h) gastrula, (i) appearance of tail bud, (l) heart, (o, p) pectoral fin. Scale bar = 1.5 mm.

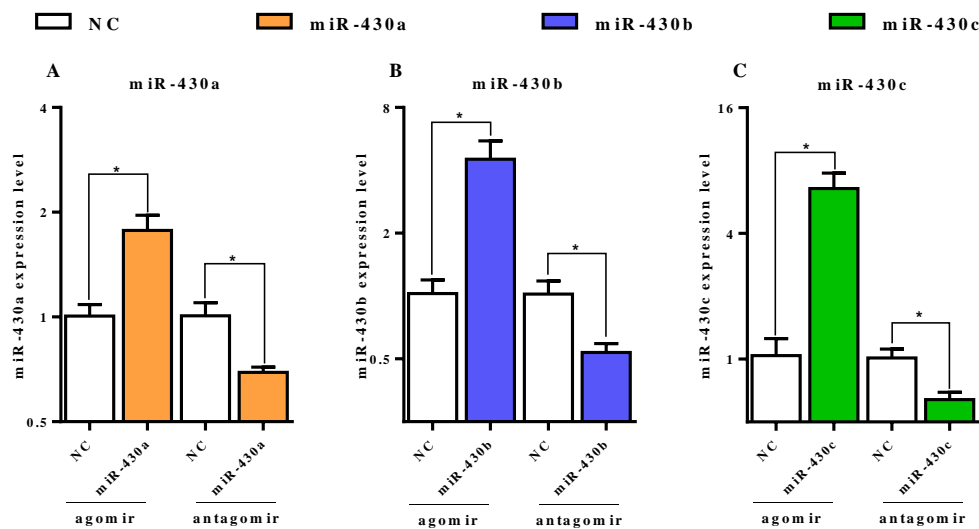

Figure S2. The miR-430 expression levels of *M. albus* after microinjection. (A) miR-430a; (B) miR-430b; (C) miR-430c. The results of qRT-PCR were performed by relative expression using U6 snRNA as the reference gene and measured by the method of optimized comparative Ct ( $2^{-\Delta\Delta Ct}$ ) value. NC stands for negative control. Values are means  $\pm$  SEM.,  $n=3$ . \*  $P \leq 0.05$  (Student's t-test).

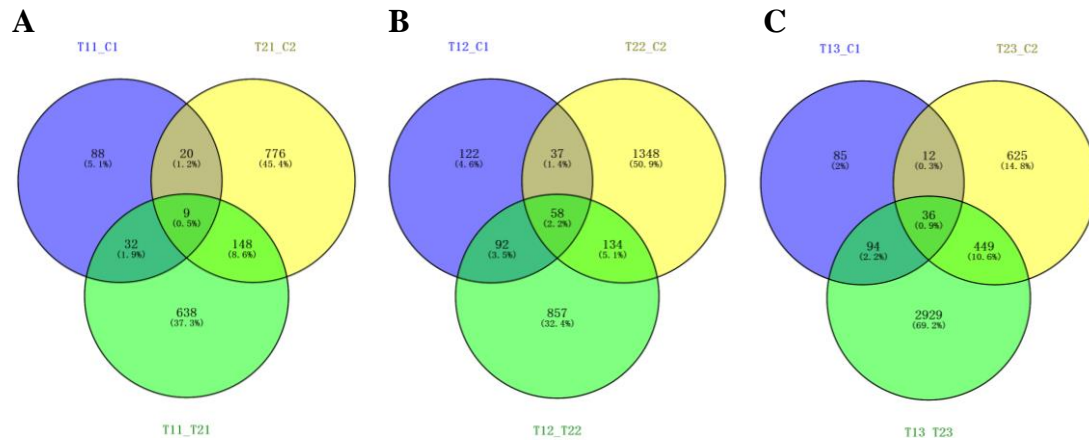

Figure S3. Venn diagram showing the number of significantly differential expressed genes identified by pairwise comparisons of different groups. (A) miR-430a; (B) miR-430b; (C) miR-430c. C1, agomirNC; C2, antagomirNC; T11, agomir430a; T21, antagomir430a; T12, agomir430b; T22, antagomir430b; T13, agomir430c; T23, antagomir430c. n=3 for each microinjection group.

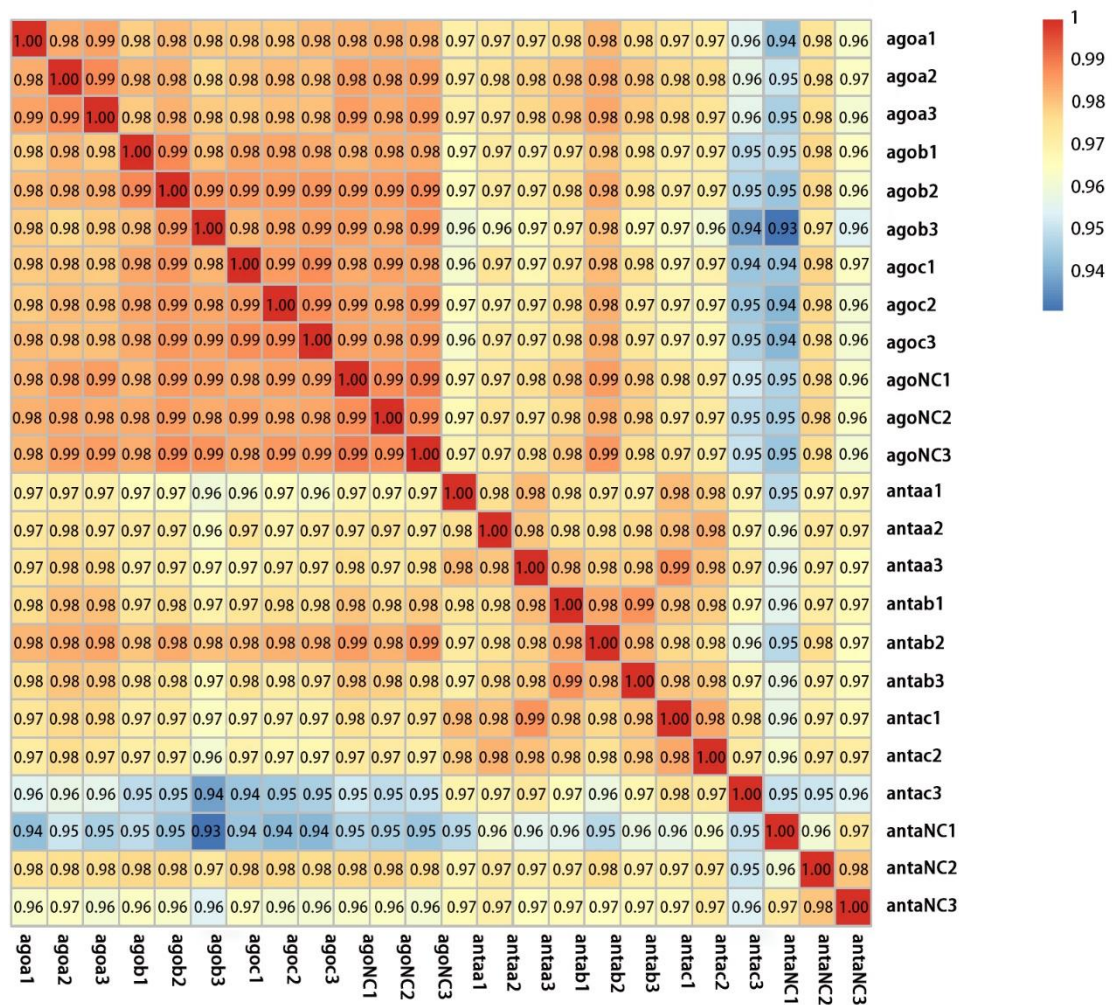

Figure S4. Heatmap of the coefficient matrix for the species-abundance clustering image. Values near 1 represent the smallest distances between the three sequence samples for each treatment.

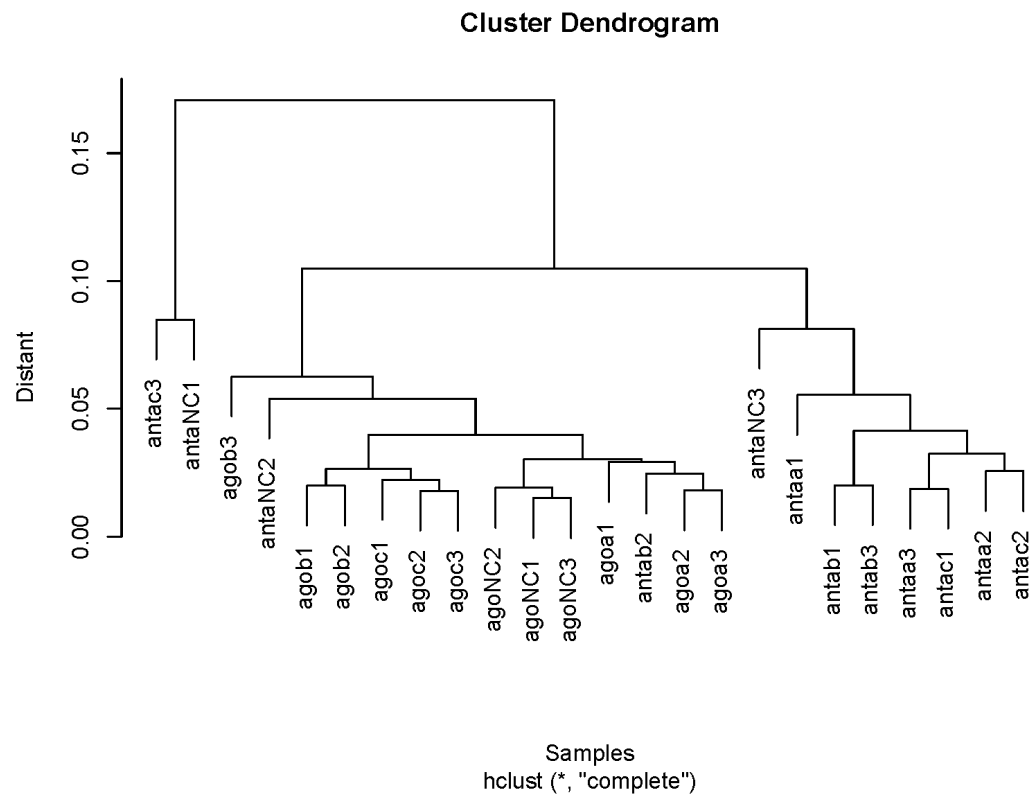

Figure S5. Cluster dendrogram of the sample-to-sample distances for the species-abundance clustering image.

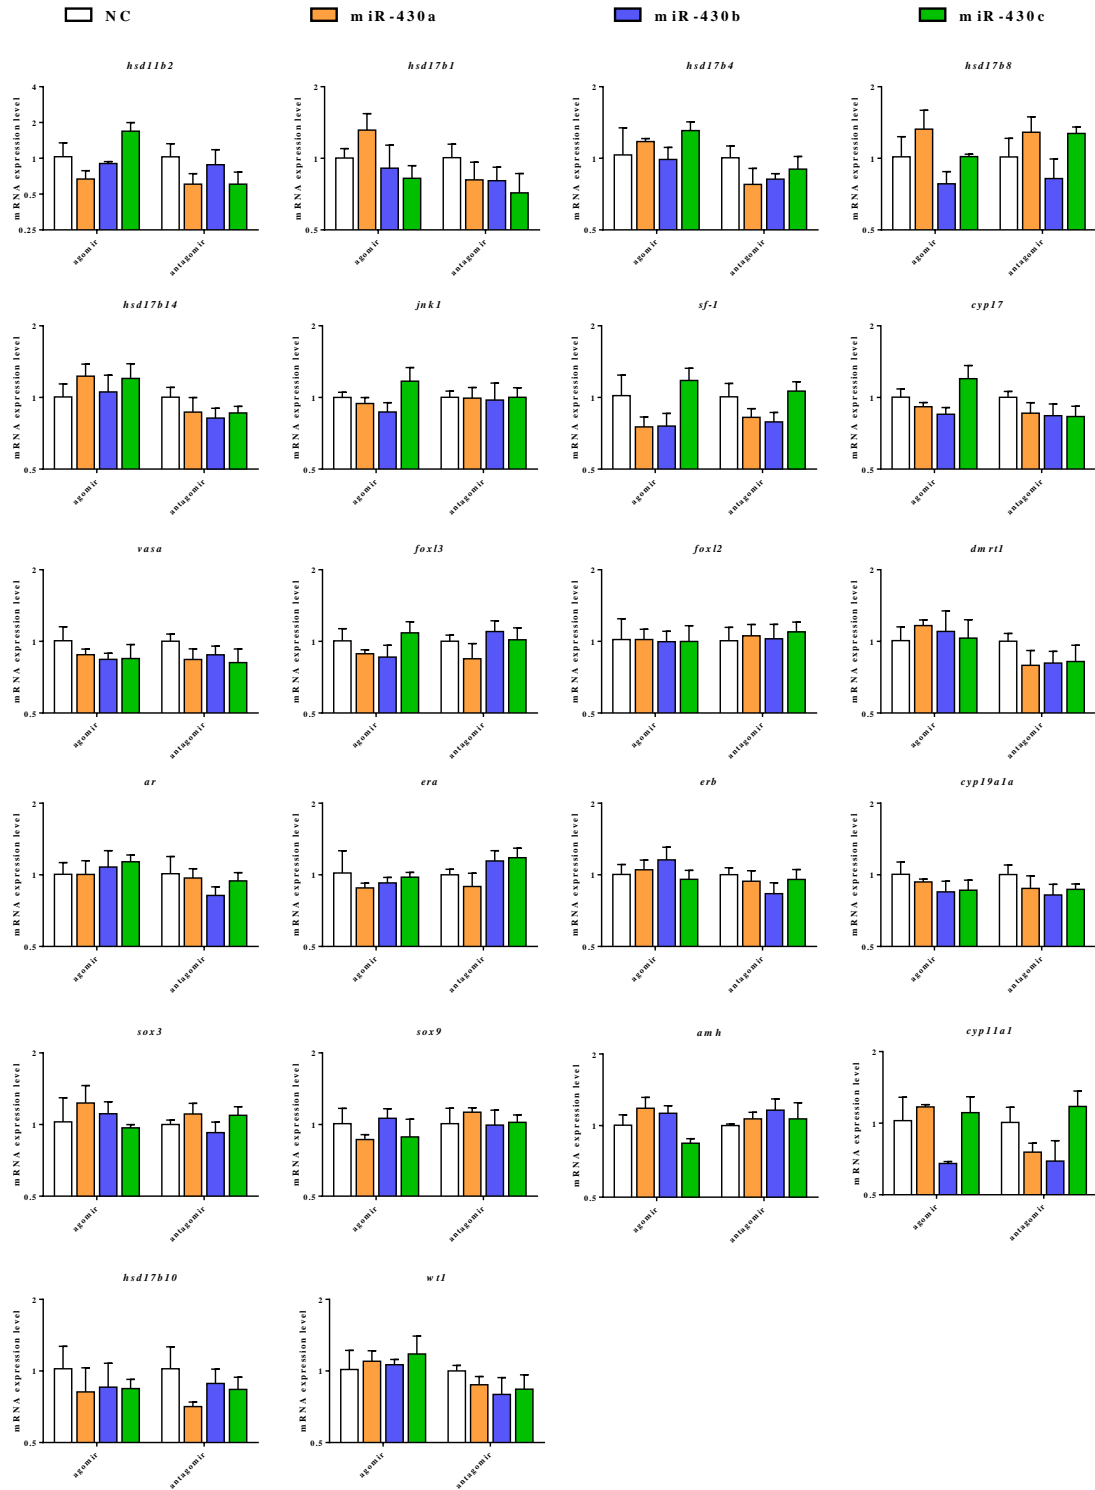

Figure S6. Candidate genes expression levels revealed by quantitative qPCR. The results of qPCR were performed by relative expression using  $\beta$ -actin and *ef1a* as the reference gene and measured by the method of optimized comparative Ct ( $2^{-\Delta\Delta Ct}$ ) value. Values are means  $\pm$  SEM., n=3. \*p < 0.05.
